# Supplementary material
Source: PubMed Central journal article supplement (PMC8210534)
Supplement: NIHMS1699841-supplement-Suppl_Material.pdf [file NIHMS1699841-supplement-Suppl_Material.pdf]

# THE LANCET Oncology

## Supplementary appendix

This appendix formed part of the original submission and has been peer reviewed. We post it as supplied by the authors.

Supplement to: Ledermann JA, Oza AM, Lorusso D, et al. Rucaparib for patients with platinum-sensitive, recurrent ovarian carcinoma (ARIEL3): post-progression outcomes and updated safety results from a randomised, placebo-controlled, phase 3 trial. *Lancet Oncol* 2020; **21**: 710–22.

## Online Supplementary Appendix

### Rucaparib for patients with platinum-sensitive, recurrent ovarian carcinoma (ARIEL3): postprogression outcomes and updated safety from a randomised, placebo-controlled, phase 3 trial

*Jonathan A Ledermann, Amit M Oza, Domenica Lorusso, Carol Aghajanian, Ana Oaknin, Andrew Dean, Nicoletta Colombo, Johanne I Weberpals, Andrew R Clamp, Giovanni Scambia, Alexandra Leary, Robert W Holloway, Margarita Amenedo Gancedo, Peter C Fong, Jeffrey C Goh, David M O'Malley, Deborah K Armstrong, Susana Banerjee, Jesus García-Donas, Elizabeth M Swisher, Terri Cameron, Lara Maloney, Sandra Goble, Robert L Coleman*

#### Table of contents

|                                                                                                                                                    |           |
|----------------------------------------------------------------------------------------------------------------------------------------------------|-----------|
| ARIEL3 Centres .....                                                                                                                               | 1         |
| Supplemental results.....                                                                                                                          | 4         |
| <i>Table S1: Summary of TEAEs in the safety population: comparison of previously reported and updated data .....</i>                               | <i>4</i>  |
| <i>Table S2: Grade 3 or higher TEAEs occurring in at least one patient in the safety population (31 Dec 2017 visit cutoff date).....</i>           | <i>5</i>  |
| <i>Figure S1: Plots of the log of the cumulative hazard.....</i>                                                                                   | <i>8</i>  |
| <i>Figure S2: Kaplan-Meier estimates of CFI (A), TFST (B), PFS2 (C), and TSST (D) in the BRCA-mutant cohort.</i>                                   | <i>9</i>  |
| <i>Figure S3: Kaplan-Meier estimates of CFI (A), TFST (B), PFS2 (C), and TSST (D) in the HRD cohort.....</i>                                       | <i>11</i> |
| <i>Figure S4. Kaplan-Meier estimates of PFS2–PFS1 in the BRCA-mutant cohort (A), HRD cohort (B), and ITT population (C).....</i>                   | <i>13</i> |
| <i>Figure S5: Postprogression outcomes in predefined cohorts and subgroups of patients with BRCA wild-type carcinomas based on LOH status.....</i> | <i>14</i> |

#### ARIEL3 CENTRES

| Principal Investigator | Site                                                                                                                                           | Patients enrolled |
|------------------------|------------------------------------------------------------------------------------------------------------------------------------------------|-------------------|
| Oza, Amit              | Princess Margaret Cancer Centre, University Health Network, Toronto, Canada                                                                    | 28                |
| Lorusso, Domenica      | Fondazione IRCCS, Istituto Nazionale dei Tumori, Milan, Italy                                                                                  | 25                |
| Aghajanian, Carol      | Memorial Sloan Kettering Cancer Center, New York, USA                                                                                          | 13                |
|                        | Memorial Sloan Kettering Cancer Center, Rockville Centre, USA                                                                                  | 3                 |
|                        | Memorial Sloan Kettering at Phelps Memorial Hospital Center, Sleepy Hollow, USA                                                                | 3                 |
|                        | Memorial Sloan Kettering Cancer Center, Basking Ridge, USA                                                                                     | 2                 |
| Coleman, Robert        | The University of Texas MD Anderson Cancer Center, Houston, USA                                                                                | 20                |
| Oaknin, Ana            | Vall d'Hebron Institute of Oncology (VHIO), Barcelona, Spain                                                                                   | 19                |
| Ledermann, Jonathan    | UCL Cancer Institute, University College London and UCL Hospitals, London, UK                                                                  | 18                |
| Colombo, Nicoletta     | University of Milan-Bicocca and European Institute of Oncology (IEO), Milan, Italy                                                             | 16                |
| Weberpals, Johanne     | Ottawa Hospital Research Institute, Ottawa, Canada                                                                                             | 16                |
| Dean, Andrew           | Saint John of God Subiaco Hospital, Subiaco, Australia                                                                                         | 16                |
| Clamp, Andrew          | The Christie NHS Foundation Trust and University of Manchester, Manchester, UK                                                                 | 15                |
| Scambia, Giovanni      | Fondazione Policlinico Universitario A. Gemelli IRCCS, Rome, Italy                                                                             | 14                |
| Leary, Alexandra       | Gustave Roussy Cancer Center, INSERM U981, and Groupe d'Investigateurs Nationaux pour l'Etude des Cancers Ovariens (GINECO), Villejuif, France | 13                |

| <b>Principal Investigator</b> | <b>Site</b>                                                                             | <b>Patients enrolled</b> |
|-------------------------------|-----------------------------------------------------------------------------------------|--------------------------|
| Holloway, Robert              | Florida Hospital Cancer Care, Orlando, USA                                              | 12                       |
| Fong, Peter                   | Auckland City Hospital, Auckland, New Zealand                                           | 11                       |
| Goh, Jeffrey                  | Royal Brisbane and Women's Hospital, Herston, Australia                                 | 11                       |
| Amenedo Gancedo, Margarita    | Oncology Center of Galicia, La Coruña, Spain                                            | 11                       |
| O'Malley, David               | The Ohio State University, James Cancer Center, Columbus, USA                           | 11                       |
| Armstrong, Deborah            | Johns Hopkins University School of Medicine, Baltimore, USA                             | 10                       |
| Swisher, Elizabeth            | University of Washington, Seattle, USA                                                  | 10                       |
| García-Donas, Jesus           | HM Hospitales—Centro Integral Oncológico Hospital de Madrid Clara Campal, Madrid, Spain | 10                       |
| Banerjee, Susana              | Royal Marsden Hospital, Sutton, UK                                                      | 5                        |
|                               | The Royal Marsden NHS Foundation Trust, London, UK                                      | 5                        |
| Floquet, Anne                 | Institut Bergonié, Bordeaux, France                                                     | 9                        |
| Scott, Clare                  | Peter MacCallum Cancer Centre, Melbourne, Australia                                     | 9                        |
| McNeish, Iain                 | Beatson West of Scotland Cancer Centre, Glasgow, UK                                     | 9                        |
| Lortholary, Alain             | Centre Catherine de Sienne, Nantes, France                                              | 8                        |
| Chen, Lee-may                 | University of California San Francisco, San Francisco, USA                              | 8                        |
| Tredan, Olivier               | Centre Léon Bérard, Lyon, France                                                        | 8                        |
| You, Benoit                   | Centre Hospitalier Lyon Sud, Pierre-Benite, France                                      | 8                        |
| Morris, Robert                | Karmanos Cancer Institute, Detroit, USA                                                 | 8                        |
| Provencher, Diane             | Centre Hospitalier de L'Université de Montréal, Montréal, Canada                        | 7                        |
| Harnett, Paul                 | Westmead Hospital, Westmead, Australia                                                  | 7                        |
| Medioni, Jacques              | Hôpital Européen Georges Pompidou, Paris, France                                        | 7                        |
| Parkinson, Christine          | Addenbrooke's Hospital, Cambridge, UK                                                   | 7                        |
| Pignata, Sandro               | Istituto Nazionale Tumori IRCCS Fondazione Pascale, Naples, Italy                       | 6                        |
| Welch, Stephen                | London Regional Cancer Centre, London, Canada                                           | 6                        |
| Vergote, Ignace               | Universitair Ziekenhuis Leuven, Leuven, Belgium                                         | 6                        |
| Konecny, Gottfried            | University of California Los Angeles, Los Angeles, USA                                  | 6                        |
| Ghatage, Prafull              | Tom Baker Cancer Center, Calgary, Canada                                                | 6                        |
| Elit, Laurie                  | Juravinski Cancer Centre, Hamilton, Canada                                              | 6                        |
| Denys, Hannelore              | Universitair Ziekenhuis Gent, Gent, Belgium                                             | 5                        |
| Plante, Marie                 | Centre Hospitalier Universitaire de Quebec, Quebec, Canada                              | 5                        |
| Levirov, Michelle             | The Lady Davis Carmel Medical Center, Haifa, Israel                                     | 5                        |
| Shapira-Frommer, Ronnie       | Chaim Sheba Medical Center, Tel HaShomer, Israel                                        | 4                        |
| Birrer, Michael               | Massachusetts General Hospital, Boston, USA                                             | 4                        |
| Chambers, Setsuko             | University of Arizona Cancer Center, Tucson, USA                                        | 4                        |
| Friedlander, Michael          | Prince of Wales Hospital, Randwick, Australia                                           | 4                        |
| Sabbatini, Roberto            | Azienda Ospedaliero-Universitaria Policlinico di Modena, Modena, Italy                  | 4                        |
| Morgan, Mark                  | University of Pennsylvania, Philadelphia, USA                                           | 4                        |
| Tamberi, Stefano              | Ospedale Civile degli Infermi, Faenza, Italy                                            | 4                        |
| Guerra, Eva María             | Hospital Ramón y Cajal, Madrid, Spain                                                   | 4                        |
| Wimberger, Pauline            | Technische Universität Dresden, Dresden, Germany                                        | 4                        |
| Amit, Amnon                   | Rambam Medical Center, Haifa, Israel                                                    | 4                        |
| Casado Herraéz, Antonio       | Hospital San Carlos Madrid, Madrid, Spain                                               | 4                        |
| Gladieff, Laurence            | Institut Claudius Régaud, Toulouse, France                                              | 3                        |
| Kichenadasse, Ganessan        | Flinders Medical Centre, Bedford Park, Australia                                        | 3                        |
| Ma, Ling                      | Rocky Mountain Cancer Centers, Lakewood, USA                                            | 3                        |
| Buck, Martin                  | Sir Charles Gairdner Hospital, Nedlands, USA                                            | 3                        |

| <b>Principal Investigator</b> | <b>Site</b>                                                                                                | <b>Patients enrolled</b> |
|-------------------------------|------------------------------------------------------------------------------------------------------------|--------------------------|
| Zamagni, Claudio              | Azienda Ospedaliero Universitaria di Bologna, Bologna, Italy                                               | 3                        |
| Dirix, Luc                    | AZ Sint Augustinus, Antwerp, Belgium                                                                       | 3                        |
| Jackson, David                | Saint James's University Hospital, Leeds, UK                                                               | 3                        |
| Buss, Mary                    | Beth Israel Deaconess Medical Center, Boston, USA                                                          | 2                        |
| Krabisch, Petra               | Klinikum Chemnitz gGmbH, Chemnitz, Germany                                                                 | 2                        |
| Kovel, Svetlana               | Assaf Harofeh Medical Center, Zerifin, Israel                                                              | 2                        |
| Powell, Melanie               | Saint Bartholomew's Hospital, London, UK                                                                   | 2                        |
| O'Donnell, Anne               | Wellington Regional Hospital, Wellington, New Zealand                                                      | 2                        |
| Neunhöffer, Tanja             | HELIOS Dr. Horst Schmidt Kliniken Wiesbaden, Klinik für Gynäkologie und Gyn. Onkologie, Wiesbaden, Germany | 2                        |
| Lotz, Jean-Pierre             | Hôpital Tenon, Paris, France                                                                               | 2                        |
| Romero, Ignacio               | Instituto Valenciano de Oncología, Valencia, Spain                                                         | 2                        |
| Vanderkwaak, Timothy          | Hope Women's Cancer Centers, Asheville, USA                                                                | 2                        |
| Safra, Tamar                  | Tel Aviv Sourasky Medical Center, Tel Aviv, Israel                                                         | 2                        |
| Gabra, Hani                   | Imperial College Healthcare NHS Trust                                                                      | 2                        |
| Sánchez, Alfonso              | Hospital Regional Universitario Carlos Haya de Málaga, Málaga, Spain                                       | 2                        |
| Stemmer, Salomon              | Rabin Medical Center, Petah Tikva, Israel                                                                  | 2                        |
| Hänle, Claudia                | Klinikum Ludwigsburg-Bietigheim gGmbH, Ludwigsburg, Germany                                                | 1                        |
| Bologna, Alessandra           | Arcispedale Santa Maria Nuova IRCCS, Reggio Emilia, Italy                                                  | 1                        |
| Mutch, David                  | Washington University School of Medicine, Saint Louis, USA                                                 | 1                        |
| Joly, Florence                | Cancer François Baclesse, Caen, France                                                                     | 1                        |
| Palacio, Isabel               | Hospital Universitario Central de Asturias, Asturias, Spain                                                | 1                        |
| Slomovitz, Brian              | Sylvester Comprehensive Cancer Center, Miami, USA                                                          | 1                        |
| Drew, Yvette                  | Freeman Hospital - Northern Centre for Cancer Care, Newcastle upon Tyne, UK                                | 1                        |
| Pölcher, Martin               | Rotkreuzklinikum München gGmbH, Munich, Germany                                                            | 1                        |
| Vulfovich, Michel             | Memorial Healthcare System, Hollywood, USA                                                                 | 1                        |
| El-Balat, Ahmed               | Universitätsklinikum Frankfurt, Frankfurt, Germany                                                         | 1                        |
| <b>Total</b>                  |                                                                                                            | <b>564</b>               |

## SUPPLEMENTAL RESULTS

**Table S1: Summary of TEAEs in the safety population: comparison of previously reported and updated data**

|                                                                                                                                                                 | Previous report*:<br>15 Apr 2017<br>visit cutoff date |                    | Updated data:<br>31 Dec 2017<br>visit cutoff date |                    |
|-----------------------------------------------------------------------------------------------------------------------------------------------------------------|-------------------------------------------------------|--------------------|---------------------------------------------------|--------------------|
|                                                                                                                                                                 | Rucaparib<br>(n=372)                                  | Placebo<br>(n=189) | Rucaparib<br>(n=372)                              | Placebo<br>(n=189) |
| <b>Any grade TEAE</b>                                                                                                                                           | 372 (100%)                                            | 182 (96%)          | 372 (100%)                                        | 182 (96%)          |
| Grade $\geq$ 3 TEAE                                                                                                                                             | 209 (56%)                                             | 28 (15%)           | 222 (60%)                                         | 30 (16%)           |
| <b>Treatment interruption and/or dose reduction</b>                                                                                                             | 263 (71%)                                             | 20 (11%)           | 267 (72%)                                         | 20 (11%)           |
| Treatment interruption due to a TEAE                                                                                                                            | 237 (64%)                                             | 19 (10%)           | 243 (65%)                                         | 19 (10%)           |
| Dose reduction due to a TEAE                                                                                                                                    | 203 (55%)                                             | 8 (4%)             | 206 (55%)                                         | 8 (4%)             |
| <b>Discontinuation due to a TEAE<sup>†</sup></b>                                                                                                                | 50 (13%)                                              | 3 (2%)             | 57 (15%)                                          | 3 (2%)             |
| <b>Deaths relating to a TEAE</b>                                                                                                                                | 6 (2%)                                                | 2 (1%)             | 7 (2%)                                            | 2 (1%)             |
| Data are n (%).<br>*Coleman RL et al. <i>Lancet</i> . 2017; 390(10106): 1949-1961.<br>†Excluding disease progression.<br>TEAE=treatment-emergent adverse event. |                                                       |                    |                                                   |                    |

**Table S2: Grade 3 or higher TEAEs occurring in at least one patient in the safety population (31 Dec 2017 visit cutoff date)**

|                                              | Rucaparib<br>(n=372) |         |         | Placebo<br>(n=189) |         |         |
|----------------------------------------------|----------------------|---------|---------|--------------------|---------|---------|
|                                              | Grade 3              | Grade 4 | Grade 5 | Grade 3            | Grade 4 | Grade 5 |
| <b>TEAE</b>                                  |                      |         |         |                    |         |         |
| Anaemia or haemoglobin decreased             | 77 (21%)             | 3 (1%)  | 0       | 0                  | 1 (1%)  | 0       |
| ALT or AST increased                         | 38 (10%)             | 0       | 0       | 0                  | 0       | 0       |
| Neutropenia or neutrophil count decreased    | 22 (6%)              | 7 (2%)  | 0       | 1 (1%)             | 1 (1%)  | 0       |
| Asthenia or fatigue                          | 26 (7%)              | 0       | 0       | 5 (3%)             | 0       | 0       |
| Thrombocytopenia or platelet count decreased | 13 (3%)              | 7 (2%)  | 0       | 0                  | 0       | 0       |
| Vomiting                                     | 15 (4%)              | 0       | 0       | 2 (1%)             | 0       | 0       |
| Nausea                                       | 14 (4%)              | 0       | 0       | 1 (1%)             | 0       | 0       |
| Abdominal pain                               | 11 (3%)              | 0       | 0       | 1 (1%)             | 0       | 0       |
| Hypertension                                 | 9 (2%)               | 0       | 0       | 4 (2%)             | 0       | 0       |
| Constipation                                 | 7 (2%)               | 0       | 0       | 2 (1%)             | 0       | 0       |
| Febrile neutropenia                          | 0                    | 5 (1%)  | 0       | 0                  | 0       | 0       |
| Malignant neoplasm progression               | 3 (1%)               | 0       | 2 (1%)  | 2 (1%)             | 0       | 0       |
| Transaminases increased                      | 5 (1%)               | 0       | 0       | 0                  | 0       | 0       |
| White blood cell count decreased             | 4 (1%)               | 1 (<1%) | 0       | 0                  | 0       | 0       |
| Dehydration                                  | 4 (1%)               | 0       | 0       | 0                  | 0       | 0       |
| Intestinal obstruction                       | 4 (1%)               | 0       | 0       | 1 (1%)             | 1 (1%)  | 0       |
| Small intestinal obstruction                 | 3 (1%)               | 1 (<1%) | 0       | 4 (2%)             | 0       | 0       |
| Weight decreased                             | 4 (1%)               | 0       | 0       | 0                  | 0       | 0       |
| Decreased appetite                           | 3 (1%)               | 0       | 0       | 0                  | 0       | 0       |
| Gamma-glutamyltransferase increased          | 3 (1%)               | 0       | 0       | 0                  | 0       | 0       |
| Pancytopenia                                 | 2 (1%)               | 1 (<1%) | 0       | 0                  | 0       | 0       |
| Pulmonary embolism                           | 2 (1%)               | 1 (<1%) | 0       | 0                  | 0       | 1 (1%)  |
| Urinary tract obstruction                    | 3 (1%)               | 0       | 0       | 0                  | 0       | 0       |
| Abdominal pain upper                         | 2 (1%)               | 0       | 0       | 0                  | 0       | 0       |
| Acute kidney injury                          | 1 (<1%)              | 1 (<1%) | 0       | 0                  | 0       | 0       |
| Arthralgia                                   | 2 (1%)               | 0       | 0       | 0                  | 0       | 0       |
| Ascites                                      | 2 (1%)               | 0       | 0       | 1 (1%)             | 0       | 0       |
| Cell death                                   | 2 (1%)               | 0       | 0       | 0                  | 0       | 0       |
| Diarrhoea                                    | 2 (1%)               | 0       | 0       | 2 (1%)             | 0       | 0       |
| Gastroenteritis                              | 2 (1%)               | 0       | 0       | 0                  | 0       | 0       |
| Hepatic enzyme increased                     | 2 (1%)               | 0       | 0       | 0                  | 0       | 0       |
| Incarcerated hernia                          | 1 (<1%)              | 1 (<1%) | 0       | 0                  | 0       | 0       |
| Lethargy                                     | 2 (1%)               | 0       | 0       | 0                  | 0       | 0       |
| Leukopenia                                   | 2 (1%)               | 0       | 0       | 0                  | 0       | 0       |
| Lymphocyte count decreased                   | 2 (1%)               | 0       | 0       | 0                  | 0       | 0       |
| Lymphoedema                                  | 2 (1%)               | 0       | 0       | 0                  | 0       | 0       |
| Mucosal inflammation                         | 2 (1%)               | 0       | 0       | 1 (1%)             | 0       | 0       |
| Myelodysplastic syndrome                     | 0                    | 1 (<1%) | 1 (<1%) | 0                  | 0       | 0       |
| Photosensitivity reaction                    | 2 (1%)               | 0       | 0       | 0                  | 0       | 0       |
| Sepsis                                       | 0                    | 2 (1%)  | 0       | 0                  | 0       | 0       |
| Syncope                                      | 2 (1%)               | 0       | 0       | 0                  | 0       | 0       |
| Urinary tract infection                      | 2 (1%)               | 0       | 0       | 1 (1%)             | 0       | 0       |
| Abdominal hernia                             | 1 (<1%)              | 0       | 0       | 0                  | 0       | 0       |
| Acute myeloid leukaemia                      | 0                    | 0       | 1 (<1%) | 0                  | 0       | 0       |
| Acute pulmonary oedema                       | 1 (<1%)              | 0       | 0       | 0                  | 0       | 0       |
| Acute respiratory distress syndrome          | 0                    | 1 (<1%) | 0       | 0                  | 0       | 0       |
| Anxiety                                      | 1 (<1%)              | 0       | 0       | 0                  | 0       | 0       |
| Arthritis infective                          | 1 (<1%)              | 0       | 0       | 0                  | 0       | 0       |
| Atrial fibrillation                          | 1 (<1%)              | 0       | 0       | 0                  | 0       | 0       |
| Atypical pneumonia                           | 1 (<1%)              | 0       | 0       | 0                  | 0       | 0       |

|                                           | Rucaparib<br>(n=372) |         |         | Placebo<br>(n=189) |         |         |
|-------------------------------------------|----------------------|---------|---------|--------------------|---------|---------|
|                                           | Grade 3              | Grade 4 | Grade 5 | Grade 3            | Grade 4 | Grade 5 |
| B-cell unclassifiable lymphoma high grade | 0                    | 0       | 1 (<1%) | 0                  | 0       | 0       |
| Bile duct obstruction                     | 1 (<1%)              | 0       | 0       | 0                  | 0       | 0       |
| Blood cholesterol increased               | 1 (<1%)              | 0       | 0       | 0                  | 0       | 0       |
| Blood creatinine increased                | 1 (<1%)              | 0       | 0       | 0                  | 0       | 0       |
| Bowen's disease                           | 1 (<1%)              | 0       | 0       | 0                  | 0       | 0       |
| Cardiac arrest                            | 0                    | 0       | 1 (<1%) | 0                  | 0       | 0       |
| Cellulitis                                | 1 (<1%)              | 0       | 0       | 0                  | 0       | 0       |
| Cholecystitis                             | 1 (<1%)              | 0       | 0       | 0                  | 0       | 0       |
| Cholelithiasis                            | 1 (<1%)              | 0       | 0       | 0                  | 0       | 0       |
| Cholestasis                               | 0                    | 1 (<1%) | 0       | 0                  | 0       | 0       |
| Cognitive disorder                        | 1 (<1%)              | 0       | 0       | 0                  | 0       | 0       |
| Colonic pseudo-obstruction                | 1 (<1%)              | 0       | 0       | 0                  | 0       | 0       |
| Creatinine renal clearance increased      | 1 (<1%)              | 0       | 0       | 0                  | 0       | 0       |
| Device related infection                  | 1 (<1%)              | 0       | 0       | 0                  | 0       | 0       |
| Drug-induced liver injury                 | 0                    | 1 (<1%) | 0       | 0                  | 0       | 0       |
| Duodenal obstruction                      | 1 (<1%)              | 0       | 0       | 0                  | 0       | 0       |
| Dyslipidaemia                             | 1 (<1%)              | 0       | 0       | 0                  | 0       | 0       |
| Dyspepsia                                 | 1 (<1%)              | 0       | 0       | 0                  | 0       | 0       |
| Exostosis                                 | 1 (<1%)              | 0       | 0       | 0                  | 0       | 0       |
| Faecaloma                                 | 1 (<1%)              | 0       | 0       | 0                  | 0       | 0       |
| Female genital tract fistula              | 0                    | 1 (<1%) | 0       | 0                  | 0       | 0       |
| Femoral neck fracture                     | 1 (<1%)              | 0       | 0       | 1 (1%)             | 0       | 0       |
| Femur fracture                            | 1 (<1%)              | 0       | 0       | 0                  | 0       | 0       |
| Fibula fracture                           | 1 (<1%)              | 0       | 0       | 0                  | 0       | 0       |
| Gastrointestinal pain                     | 1 (<1%)              | 0       | 0       | 0                  | 0       | 0       |
| Gastrointestinal stoma output increased   | 1 (<1%)              | 0       | 0       | 0                  | 0       | 0       |
| General physical health deterioration     | 1 (<1%)              | 0       | 0       | 0                  | 0       | 0       |
| Glomerular filtration rate decreased      | 1 (<1%)              | 0       | 0       | 0                  | 0       | 0       |
| Haematocrit decreased                     | 1 (<1%)              | 0       | 0       | 0                  | 0       | 0       |
| Headache                                  | 1 (<1%)              | 0       | 0       | 1 (1%)             | 0       | 0       |
| Hepatic failure                           | 1 (<1%)              | 0       | 0       | 0                  | 0       | 0       |
| Histiocytosis haematophagic               | 0                    | 0       | 1 (<1%) | 0                  | 0       | 0       |
| Hypercholesterolaemia                     | 0                    | 1 (<1%) | 0       | 0                  | 0       | 0       |
| Hypernatraemia                            | 1 (<1%)              | 0       | 0       | 0                  | 0       | 0       |
| Hypertransaminasaemia                     | 1 (<1%)              | 0       | 0       | 0                  | 0       | 0       |
| Hypertriglyceridaemia                     | 1 (<1%)              | 0       | 0       | 0                  | 0       | 0       |
| Hyperuricaemia                            | 1 (<1%)              | 0       | 0       | 0                  | 0       | 0       |
| Hypoaacusis                               | 1 (<1%)              | 0       | 0       | 0                  | 0       | 0       |
| Hypoalbuminaemia                          | 1 (<1%)              | 0       | 0       | 0                  | 0       | 0       |
| Hypocalcaemia                             | 1 (<1%)              | 0       | 0       | 0                  | 0       | 0       |
| Hypokalaemia                              | 1 (<1%)              | 0       | 0       | 0                  | 0       | 0       |
| Hypomagnesaemia                           | 1 (<1%)              | 0       | 0       | 0                  | 0       | 0       |
| Hypophosphataemia                         | 1 (<1%)              | 0       | 0       | 0                  | 0       | 0       |
| Hypotension                               | 1 (<1%)              | 0       | 0       | 0                  | 0       | 0       |
| Infusion related reaction                 | 1 (<1%)              | 0       | 0       | 0                  | 0       | 0       |
| Jaundice                                  | 1 (<1%)              | 0       | 0       | 0                  | 0       | 0       |
| Leukocytosis                              | 1 (<1%)              | 0       | 0       | 1 (1%)             | 0       | 0       |
| Lower respiratory tract infection         | 1 (<1%)              | 0       | 0       | 0                  | 0       | 0       |
| Malignant bowel obstruction               | 1 (<1%)              | 0       | 0       | 0                  | 0       | 0       |
| Muscular weakness                         | 1 (<1%)              | 0       | 0       | 0                  | 0       | 0       |
| Neutropenic colitis                       | 1 (<1%)              | 0       | 0       | 0                  | 0       | 0       |
| Oedema peripheral                         | 1 (<1%)              | 0       | 0       | 0                  | 0       | 0       |
| Oral herpes                               | 1 (<1%)              | 0       | 0       | 0                  | 0       | 0       |
| Osteoarthritis                            | 1 (<1%)              | 0       | 0       | 0                  | 0       | 0       |

|                                            | Rucaparib<br>(n=372) |         |         | Placebo<br>(n=189) |         |         |
|--------------------------------------------|----------------------|---------|---------|--------------------|---------|---------|
|                                            | Grade 3              | Grade 4 | Grade 5 | Grade 3            | Grade 4 | Grade 5 |
| Palmar-plantar erythrodysesthesia syndrome | 1 (<1%)              | 0       | 0       | 0                  | 0       | 0       |
| Pelvic pain                                | 1 (<1%)              | 0       | 0       | 0                  | 0       | 0       |
| Pericardial effusion                       | 0                    | 1 (<1%) | 0       | 0                  | 0       | 0       |
| Pleural effusion                           | 1 (<1%)              | 0       | 0       | 0                  | 0       | 0       |
| Pyelonephritis                             | 0                    | 1 (<1%) | 0       | 0                  | 0       | 0       |
| Rash                                       | 1 (<1%)              | 0       | 0       | 0                  | 0       | 0       |
| Renal failure                              | 1 (<1%)              | 0       | 0       | 0                  | 0       | 0       |
| Renal impairment                           | 1 (<1%)              | 0       | 0       | 0                  | 0       | 0       |
| Sciatica                                   | 1 (<1%)              | 0       | 0       | 0                  | 0       | 0       |
| Seizure                                    | 1 (<1%)              | 0       | 0       | 0                  | 0       | 0       |
| Squamous cell carcinoma of lung            | 1 (<1%)              | 0       | 0       | 0                  | 0       | 0       |
| Tibia fracture                             | 1 (<1%)              | 0       | 0       | 0                  | 0       | 0       |
| Tonsillitis                                | 1 (<1%)              | 0       | 0       | 0                  | 0       | 0       |
| Tooth abscess                              | 1 (<1%)              | 0       | 0       | 0                  | 0       | 0       |
| Toothache                                  | 1 (<1%)              | 0       | 0       | 0                  | 0       | 0       |
| Traumatic fracture                         | 1 (<1%)              | 0       | 0       | 0                  | 0       | 0       |
| Type 2 diabetes mellitus                   | 1 (<1%)              | 0       | 0       | 0                  | 0       | 0       |
| Viral infection                            | 1 (<1%)              | 0       | 0       | 0                  | 0       | 0       |
| Viral upper respiratory tract infection    | 1 (<1%)              | 0       | 0       | 0                  | 0       | 0       |
| Wound complication                         | 1 (<1%)              | 0       | 0       | 0                  | 0       | 0       |
| Upper respiratory tract infection          | 0                    | 0       | 0       | 2 (1%)             | 0       | 0       |
| Abnormal behaviour                         | 0                    | 0       | 0       | 1 (1%)             | 0       | 0       |
| Blepharitis                                | 0                    | 0       | 0       | 1 (1%)             | 0       | 0       |
| Bone pain                                  | 0                    | 0       | 0       | 1 (1%)             | 0       | 0       |
| Cataract                                   | 0                    | 0       | 0       | 1 (1%)             | 0       | 0       |
| Dizziness                                  | 0                    | 0       | 0       | 1 (1%)             | 0       | 0       |
| Forearm fracture                           | 0                    | 0       | 0       | 1 (1%)             | 0       | 0       |
| Hyponatraemia                              | 0                    | 0       | 0       | 1 (1%)             | 0       | 0       |
| Incisional hernia                          | 0                    | 0       | 0       | 1 (1%)             | 0       | 0       |
| Lung infection                             | 0                    | 0       | 0       | 1 (1%)             | 0       | 0       |
| Metastases to meninges                     | 0                    | 0       | 0       | 0                  | 0       | 1 (1%)  |
| Sinus bradycardia                          | 0                    | 0       | 0       | 1 (1%)             | 0       | 0       |
| Stoma site infection                       | 0                    | 0       | 0       | 1 (1%)             | 0       | 0       |

Data are n (%).

Sorted by decreasing incidence of grade  $\geq 3$  TEAEs in the rucaparib arm of the updated safety analysis.

ALT=alanine aminotransferase. AST=aspartate aminotransferase. TEAE=treatment-emergent adverse event.



**Figure S1: Plots of the log of the cumulative hazard**

Log-log plots of the time to investigator-assessed disease progression or death during ARIEL3 (PFS1; A) and the time to investigator-assessed disease progression on subsequent therapy or death (PFS2; B) in the rucaparib (red) and placebo (blue) groups for patients in the intention-to-treat population.

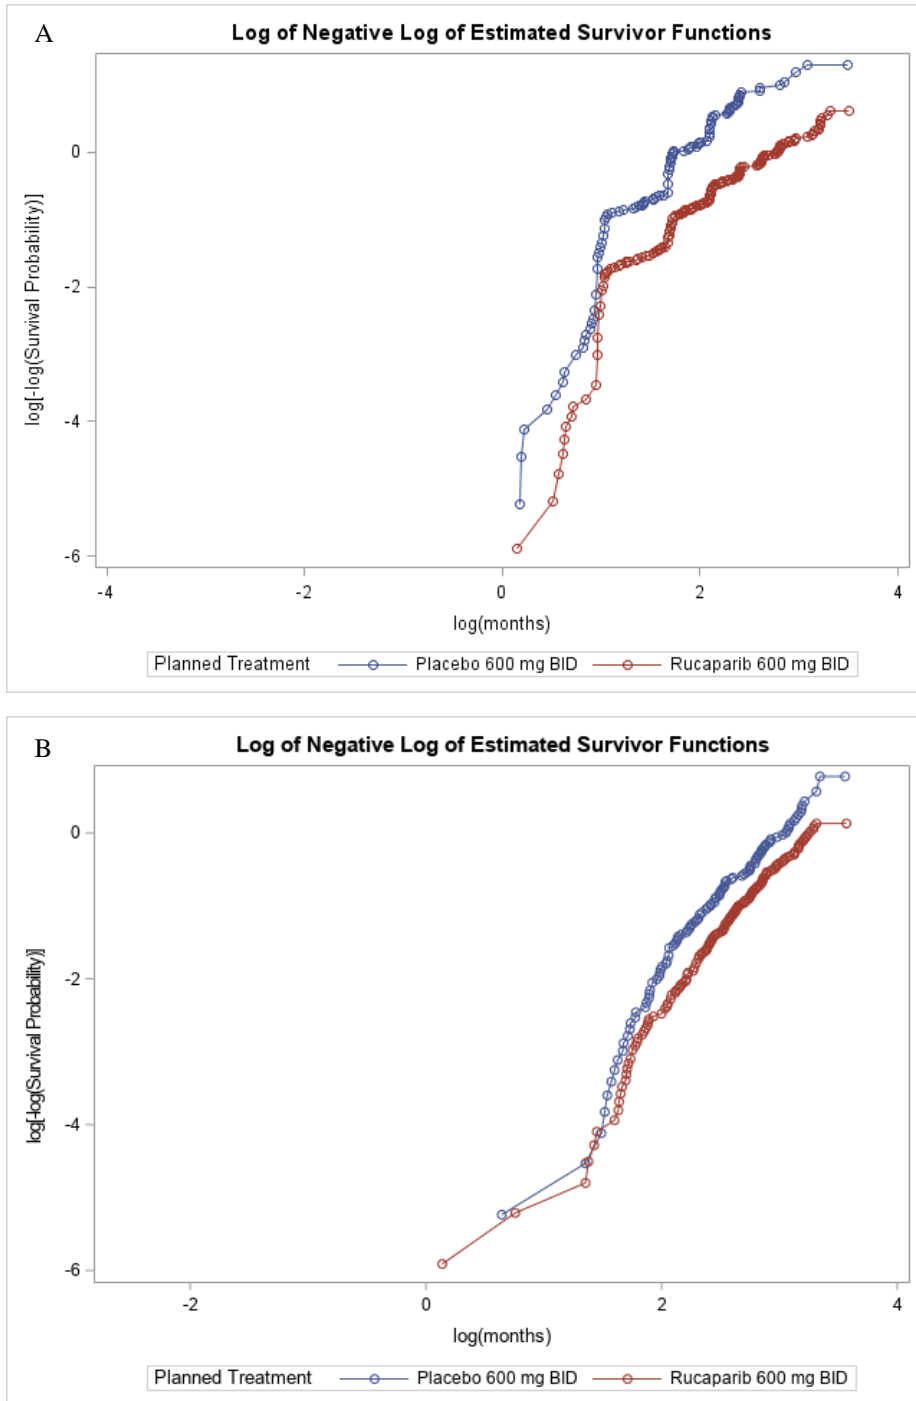

BID=twice daily.

**Figure S2: Kaplan-Meier estimates of CFI (A), TFST (B), PFS2 (C), and TSST (D) in the *BRCA*-mutant cohort**

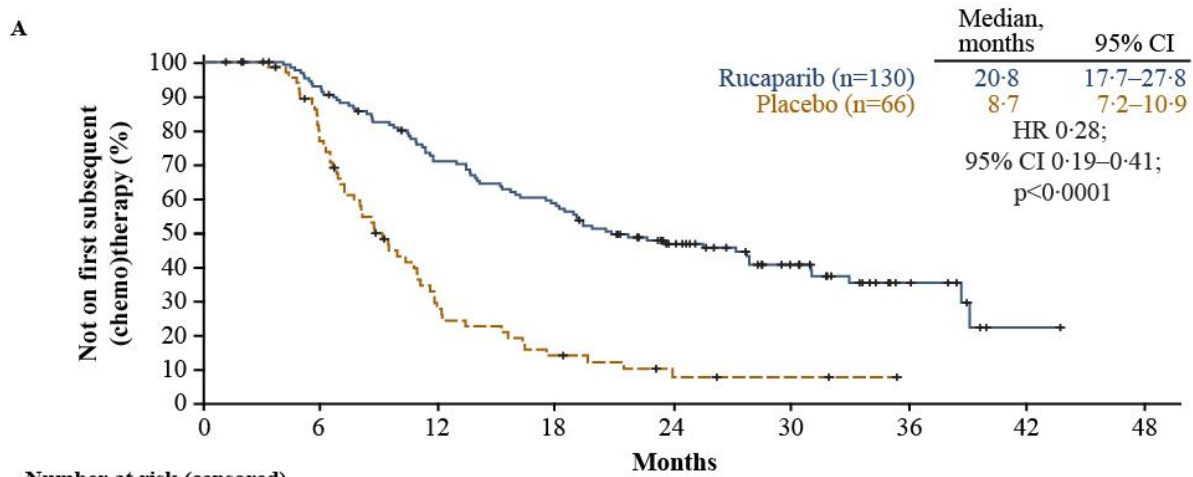

| Number at risk (censored) |         | 0       | 6      | 12     | 18      | 24      | 30     | 36     | 42     | 48 |
|---------------------------|---------|---------|--------|--------|---------|---------|--------|--------|--------|----|
| Rucaparib                 | 130 (0) | 115 (5) | 86 (8) | 70 (8) | 46 (19) | 27 (33) | 9 (48) | 1 (54) | 0 (55) |    |
| Placebo                   | 66 (0)  | 49 (2)  | 16 (5) | 8 (5)  | 3 (7)   | 2 (8)   | 0 (10) |        |        |    |

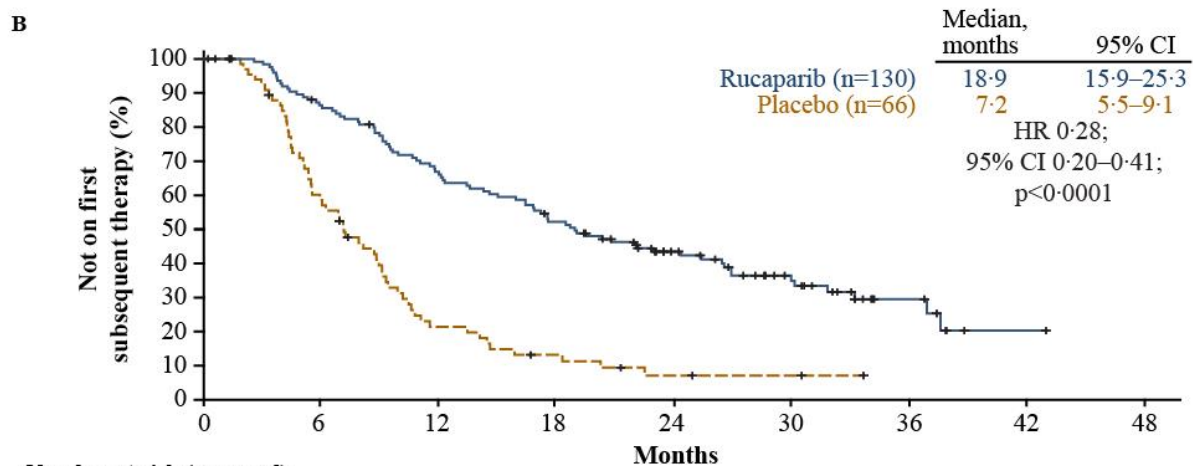

| Number at risk (censored) |         | 0       | 6      | 12     | 18      | 24      | 30     | 36     | 42     | 48 |
|---------------------------|---------|---------|--------|--------|---------|---------|--------|--------|--------|----|
| Rucaparib                 | 130 (0) | 107 (6) | 81 (7) | 63 (8) | 40 (21) | 23 (31) | 8 (43) | 1 (48) | 0 (49) |    |
| Placebo                   | 66 (0)  | 38 (1)  | 13 (3) | 7 (4)  | 3 (5)   | 2 (6)   | 0 (8)  |        |        |    |

C

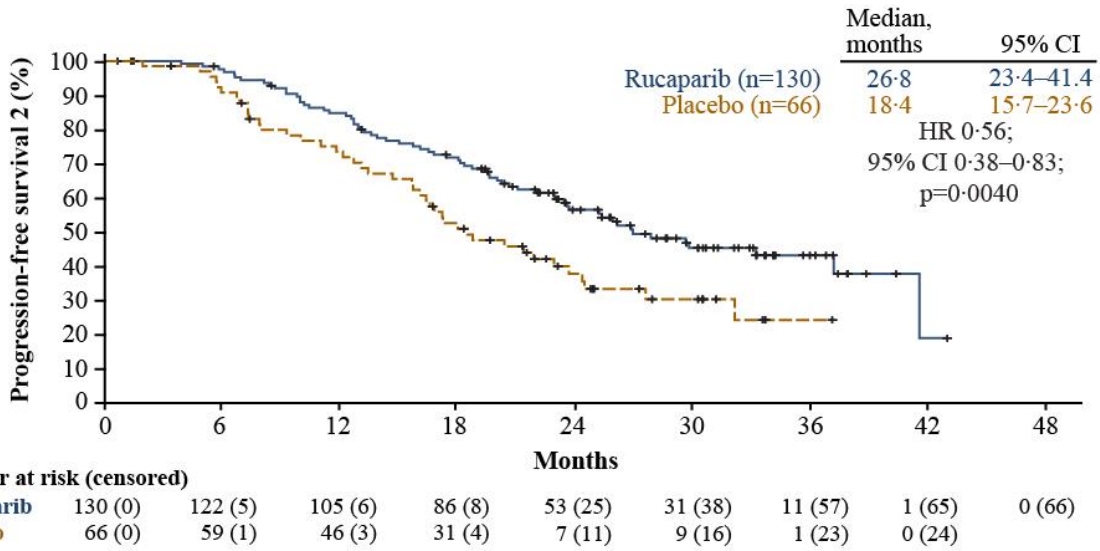

D

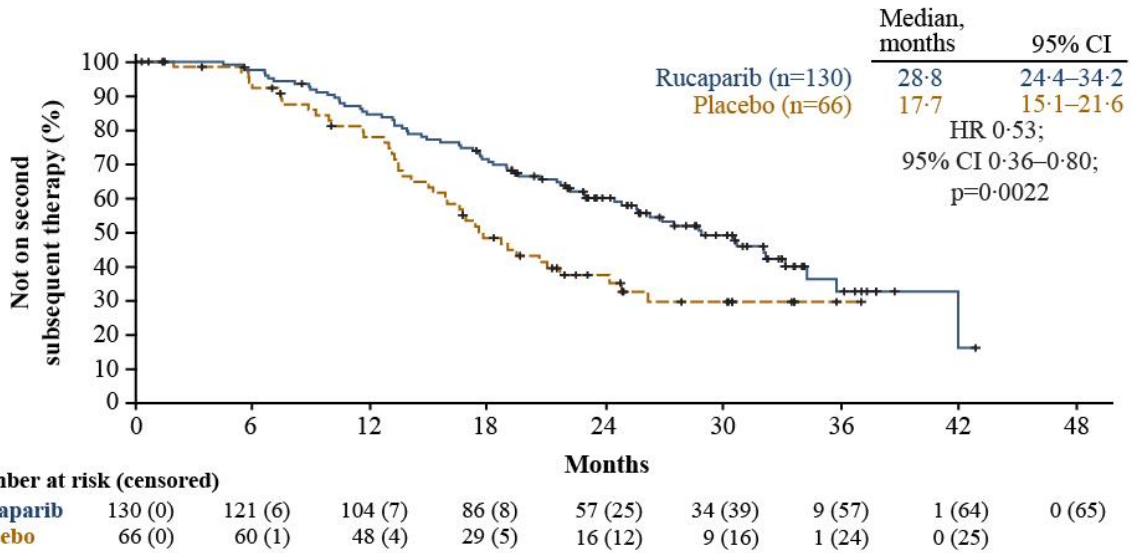

CFI=chemotherapy-free interval. HR=hazard ratio. PFS2=time to disease progression on subsequent therapy or death. TFST=time to start of first subsequent therapy. TSST=time to start of second subsequent therapy.

Figure S3: Kaplan-Meier estimates of CFI (A), TFST (B), PFS2 (C), and TSST (D) in the HRD cohort

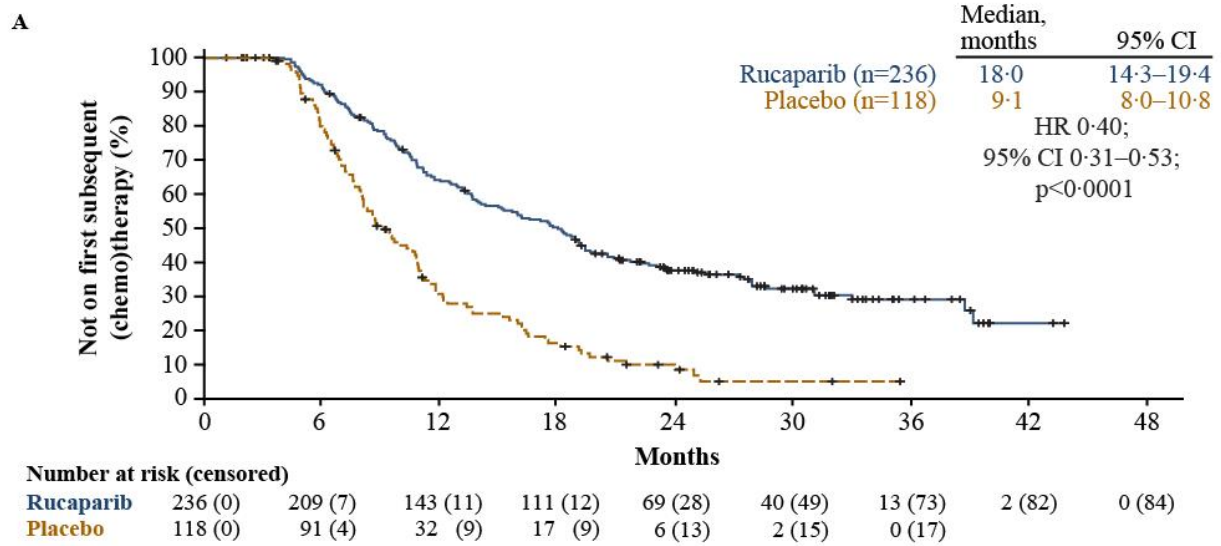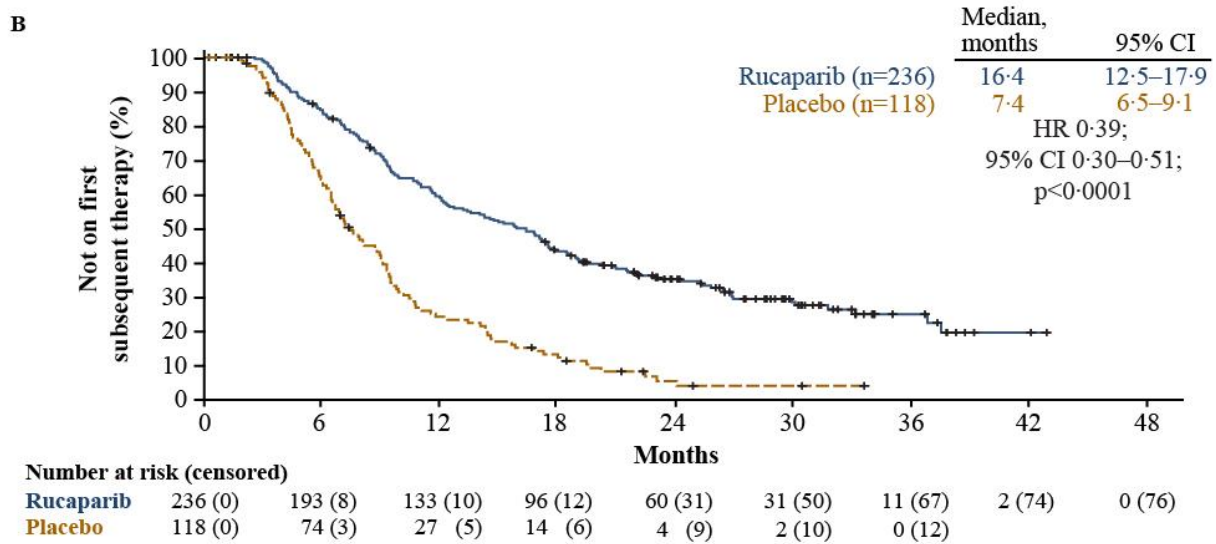

C

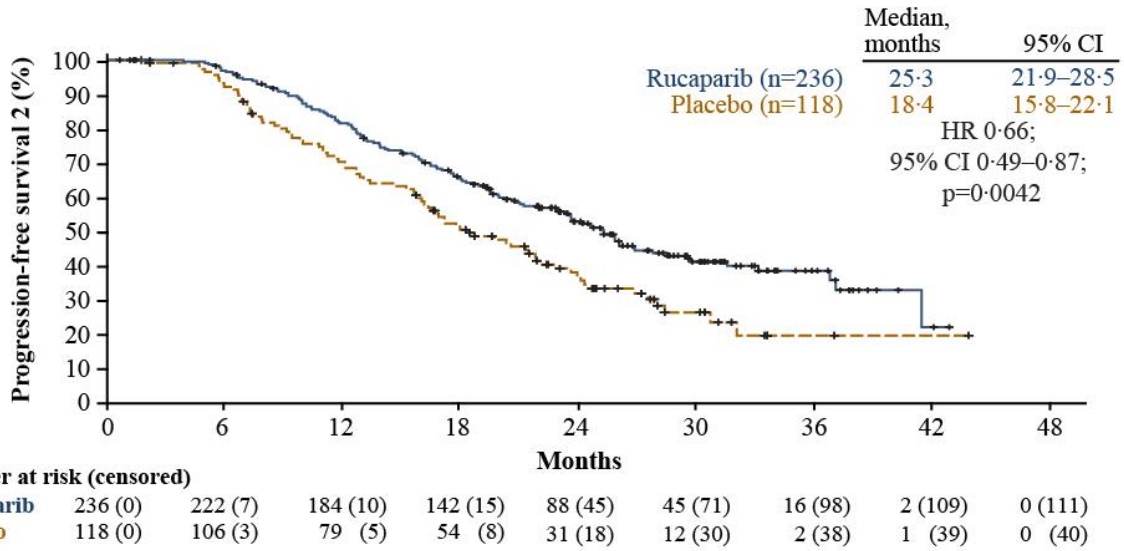

D

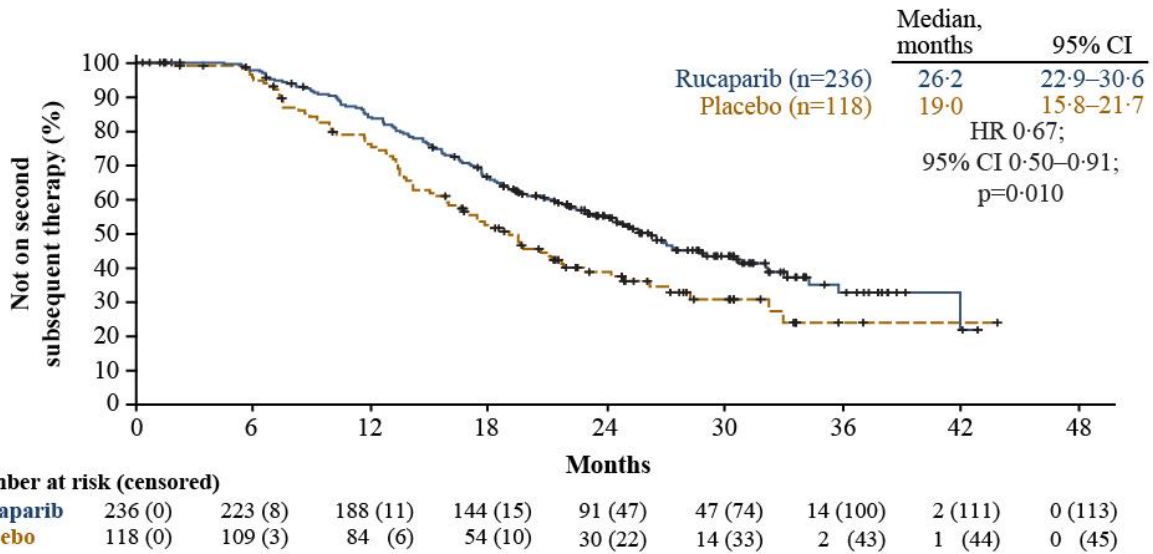

CFI=chemotherapy-free interval. HR=hazard ratio. HRD=homologous recombination deficient. PFS2=time to disease progression on subsequent therapy or death. TFST=time to start of first subsequent therapy. TSST=time to start of second subsequent therapy.

**Figure S4. Kaplan-Meier estimates of PFS2–PFS1 in the BRCA-mutant cohort (A), HRD cohort (B), and ITT population (C)**

**A**

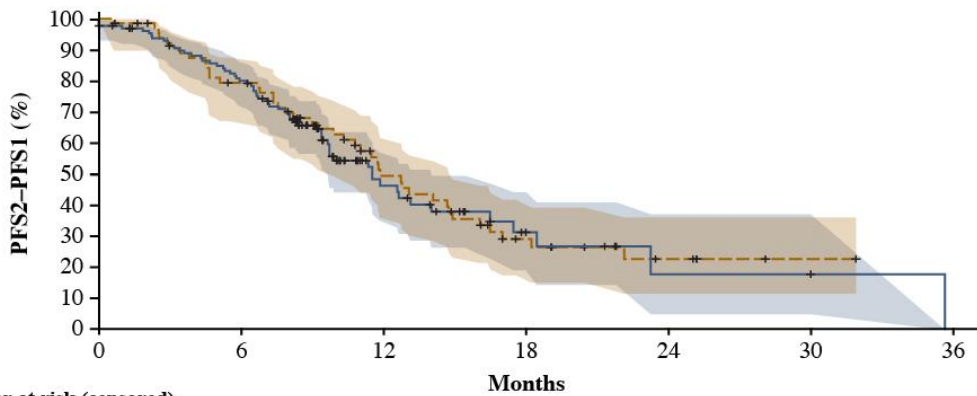

| Number at risk (censored) |         | Months |         |         |        |        |        |  |
|---------------------------|---------|--------|---------|---------|--------|--------|--------|--|
| Rucaparib                 | 130 (0) | 99 (6) | 23 (52) | 8 (61)  | 2 (65) | 1 (66) | 0 (66) |  |
| Placebo                   | 66 (0)  | 49 (4) | 25 (11) | 11 (15) | 5 (19) | 1 (23) | 0 (24) |  |

**B**

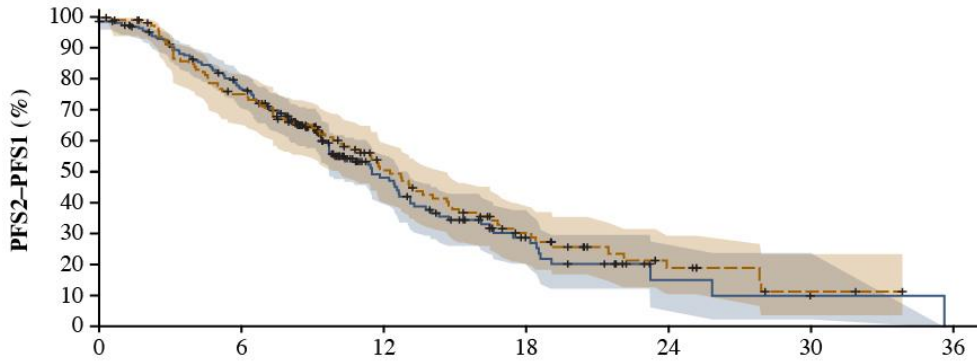

| Number at risk (censored) |         | Months   |         |          |         |         |         |  |
|---------------------------|---------|----------|---------|----------|---------|---------|---------|--|
| Rucaparib                 | 236 (0) | 173 (11) | 47 (89) | 18 (101) | 3 (110) | 1 (111) | 0 (111) |  |
| Placebo                   | 118 (0) | 84 (6)   | 45 (20) | 21 (27)  | 8 (34)  | 2 (38)  | 0 (40)  |  |

**C**

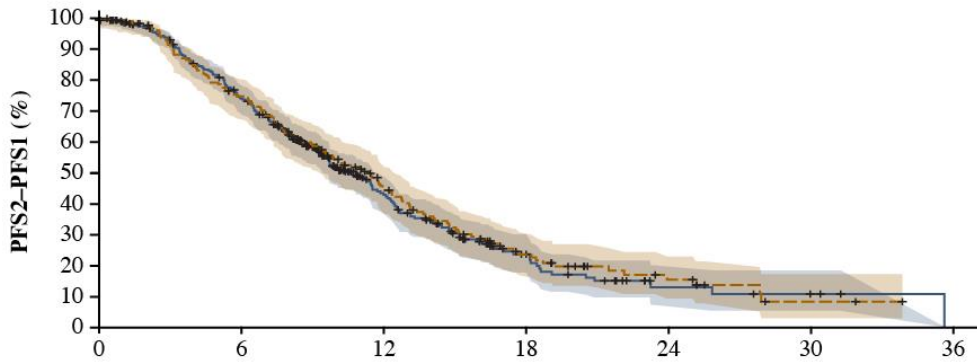

| Number at risk (censored) |         | Months   |          |          |         |         |         |  |
|---------------------------|---------|----------|----------|----------|---------|---------|---------|--|
| Rucaparib                 | 375 (0) | 259 (22) | 79 (116) | 26 (138) | 6 (148) | 3 (150) | 0 (152) |  |
| Placebo                   | 189 (0) | 132 (11) | 65 (29)  | 25 (40)  | 10 (48) | 2 (53)  | 0 (55)  |  |

Shaded areas indicate 95% confidence intervals.

HRD=homologous recombination deficient. ITT=intention to treat. PFS1=time to first disease progression event or death. PFS2=time to disease progression on subsequent therapy or death.

**Figure S5: Postprogression outcomes in predefined cohorts and subgroups of patients with *BRCA* wild-type carcinomas based on LOH status**

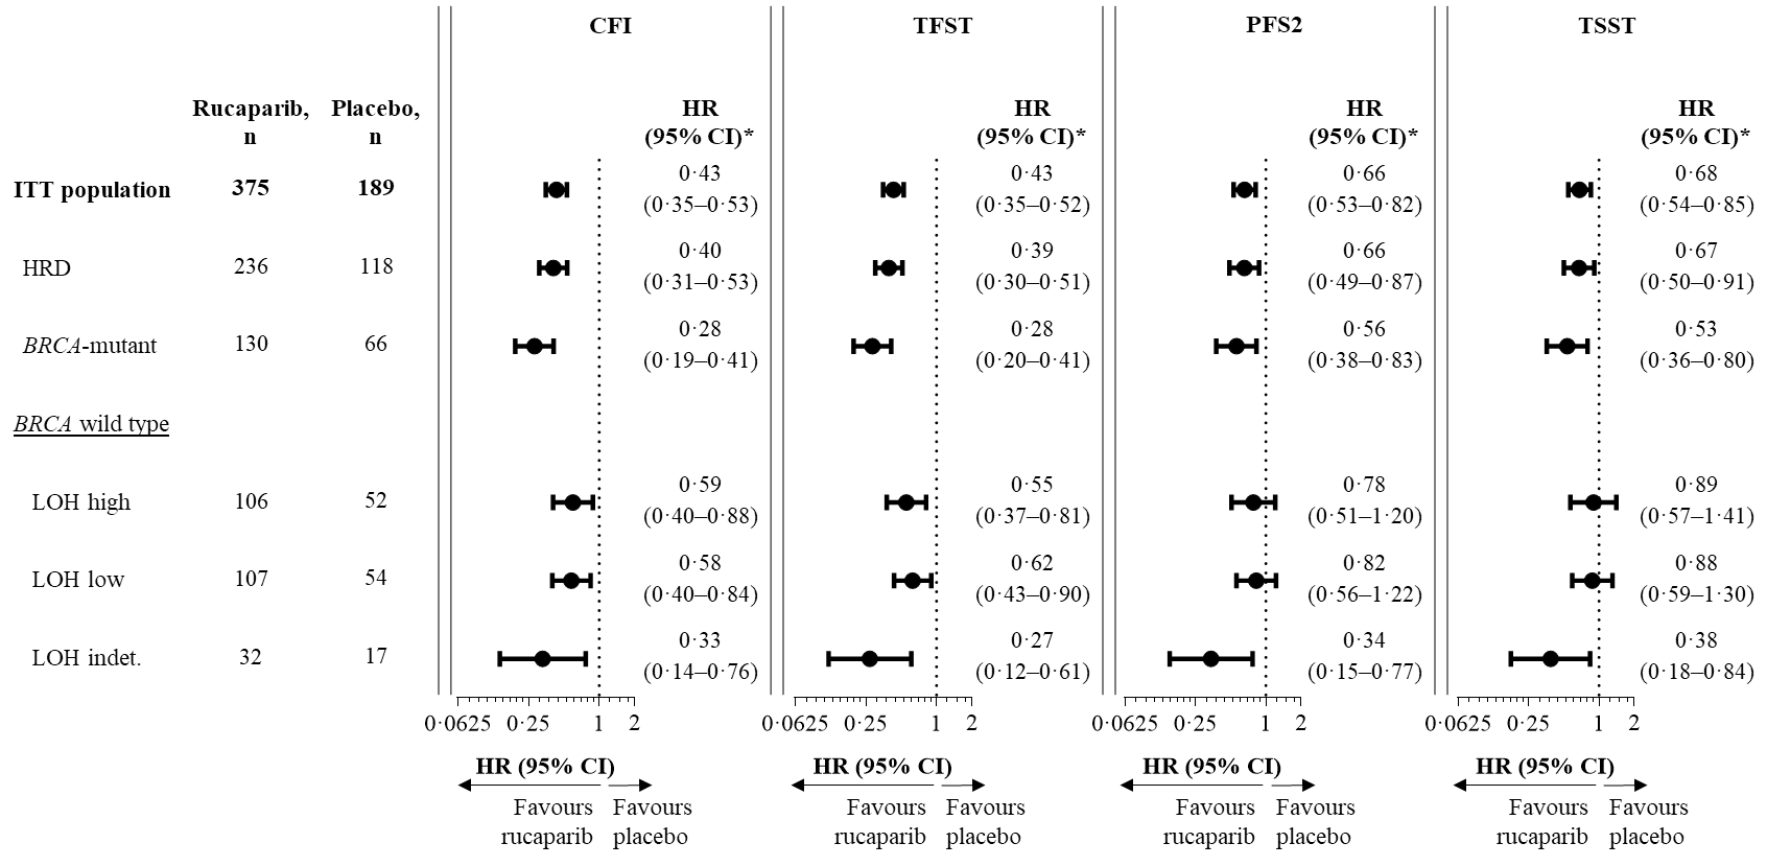

\*Cox proportional hazard model.

CFI=chemotherapy-free interval. HR=hazard ratio. HRD=homologous recombination deficient. indet.=indeterminate. ITT=intention to treat. LOH=loss of heterozygosity. PFS2=time to disease progression on subsequent therapy or death. TFST=time to start of first subsequent therapy. TSST=time to start of second subsequent therapy.
